# Supplementary material for: Metabolic characteristics of subjects with spine–femur bone mineral density discordances: the Korean National Health and Nutrition Examination Survey (KNHANES 2008–2011)
Source: Springer Nature journal article supplement (doi:10.1007/s00774-018-0980-6), 2019-01-03
Supplement: MOESM1 [file 16373110]

**Journal of Bone and Mineral Metabolism**

**Metabolic characteristics of subjects with spine-femur bone mineral density discordances: The Korean National Health and Nutrition Examination Survey (KNHANES 2008-2011)**

A Ram Hong1, Jung Hee Kim2, Ji Hyun Lee2, Sang Wan Kim2,3, and Chan Soo Shin2

1Department of Internal Medicine, Chonnam National University Medical School, Gwangju, South Korea

2Department of Internal Medicine, Seoul National University College of Medicine, Seoul, South Korea

3Department of Internal Medicine, Seoul Metropolitan Government Boramae Medical Center, Seoul, South Korea

**Address all correspondence and requests for reprints to:**

**Chan Soo Shin, MD, PhD**

Department of Internal Medicine, Seoul National University College of Medicine

101 Daehak-ro, Jongno-gu, Seoul 110-744, Korea

Phone +82-2-2072-3734, Fax +82-2-765-3734

E-mail: [csshin@snu.ac.kr](mailto:csshin@snu.ac.kr)

| **Supplementary Table 1.** Correlation analysis between TH BMD and other skeletal parameters in men | | | | |
| --- | --- | --- | --- | --- |
| (a) Overall (*n*=3,233) | | | | |
|  | R2 | *P* | Age and BMI-adjusted R2 | Age and BMI--adjusted *P* |
| Age (year) | -0.357 | <0.001 | – | – |
| BMI (kg/m2) | 0.456 | <0.001 | – | – |
| LS BMD (g/cm2) | 0.679 | <0.001 | 0.637 | <0.001 |
| FN BMD (g/cm2) | 0.888 | <0.001 | 0.851 | <0.001 |
| (b) Men without discordance (*n*=2,816) | | | | |
|  | R2 | *P* | Age and BMI-adjusted R2 | Age and BMI--adjusted *P* |
| Age (year) | -0.360 | <0.001 | – | – |
| BMI (kg/m2) | 0.455 | <0.001 | – | – |
| LS BMD (g/cm2) | 0.757 | <0.001 | 0.708 | <0.001 |
| FN BMD (g/cm2) | 0.894 | <0.001 | 0.859 | <0.001 |
| (c) Men with discordance (*n*=417) | | | | |
|  | R2 | *P* | Age and BMI-adjusted R2 | Age and BMI--adjusted *P* |
| Age (year) | -0.390 | <0.001 | – | – |
| BMI (kg/m2) | 0.455 | <0.001 | – | – |
| LS BMD (g/cm2) | 0.460 | <0.001 | 0.488 | <0.001 |
| FN BMD (g/cm2) | 0.859 | <0.001 | 0.809 | <0.001 |

| **Supplementary Table 2.** Correlation analysis between TH BMD and other skeletal parameters in women | | | | |
| --- | --- | --- | --- | --- |
| (a) Overall (*n*=2,915) | | | | |
|  | R2 | *P* | Age and BMI-adjusted R2 | Age and BMI--adjusted *P* |
| Age (year) | -0.590 | <0.001 | – | – |
| BMI (kg/m2) | 0.308 | <0.001 | – | – |
| LS BMD (g/cm2) | 0.708 | <0.001 | 0.564 | <0.001 |
| FN BMD (g/cm2) | 0.903 | <0.001 | 0.834 | <0.001 |
| (b) Women without discordance (*n*=2,625) | | | | |
|  | R2 | *P* | Age and BMI-adjusted R2 | Age and BMI--adjusted *P* |
| Age (year) | -0.584 | <0.001 | – | – |
| BMI (kg/m2) | 0.324 | <0.001 | – | – |
| LS BMD (g/cm2) | 0.778 | <0.001 | 0.649 | <0.001 |
| FN BMD (g/cm2) | 0.906 | <0.001 | 0.838 | <0.001 |
| (c) Women with discordance (*n*=290) | | | | |
|  | R2 | *P* | Age and BMI-adjusted R2 | Age and BMI--adjusted *P* |
| Age (year) | -0.664 | <0.001 | – | – |
| BMI (kg/m2) | 0.164 | <0.001 | – | – |
| LS BMD (g/cm2) | 0.330 | <0.001 | 0.245 | <0.001 |
| FN BMD (g/cm2) | 0.884 | <0.001 | 0.790 | <0.001 |
